# Supplementary material
Source: bioRxiv or medRxiv preprint supplement (https://www.biorxiv.org/content/biorxiv/early/2019/10/08/797746/DC1/embed/media-1.pdf)

# Supplementary Figure S1 He, Ding et. al.

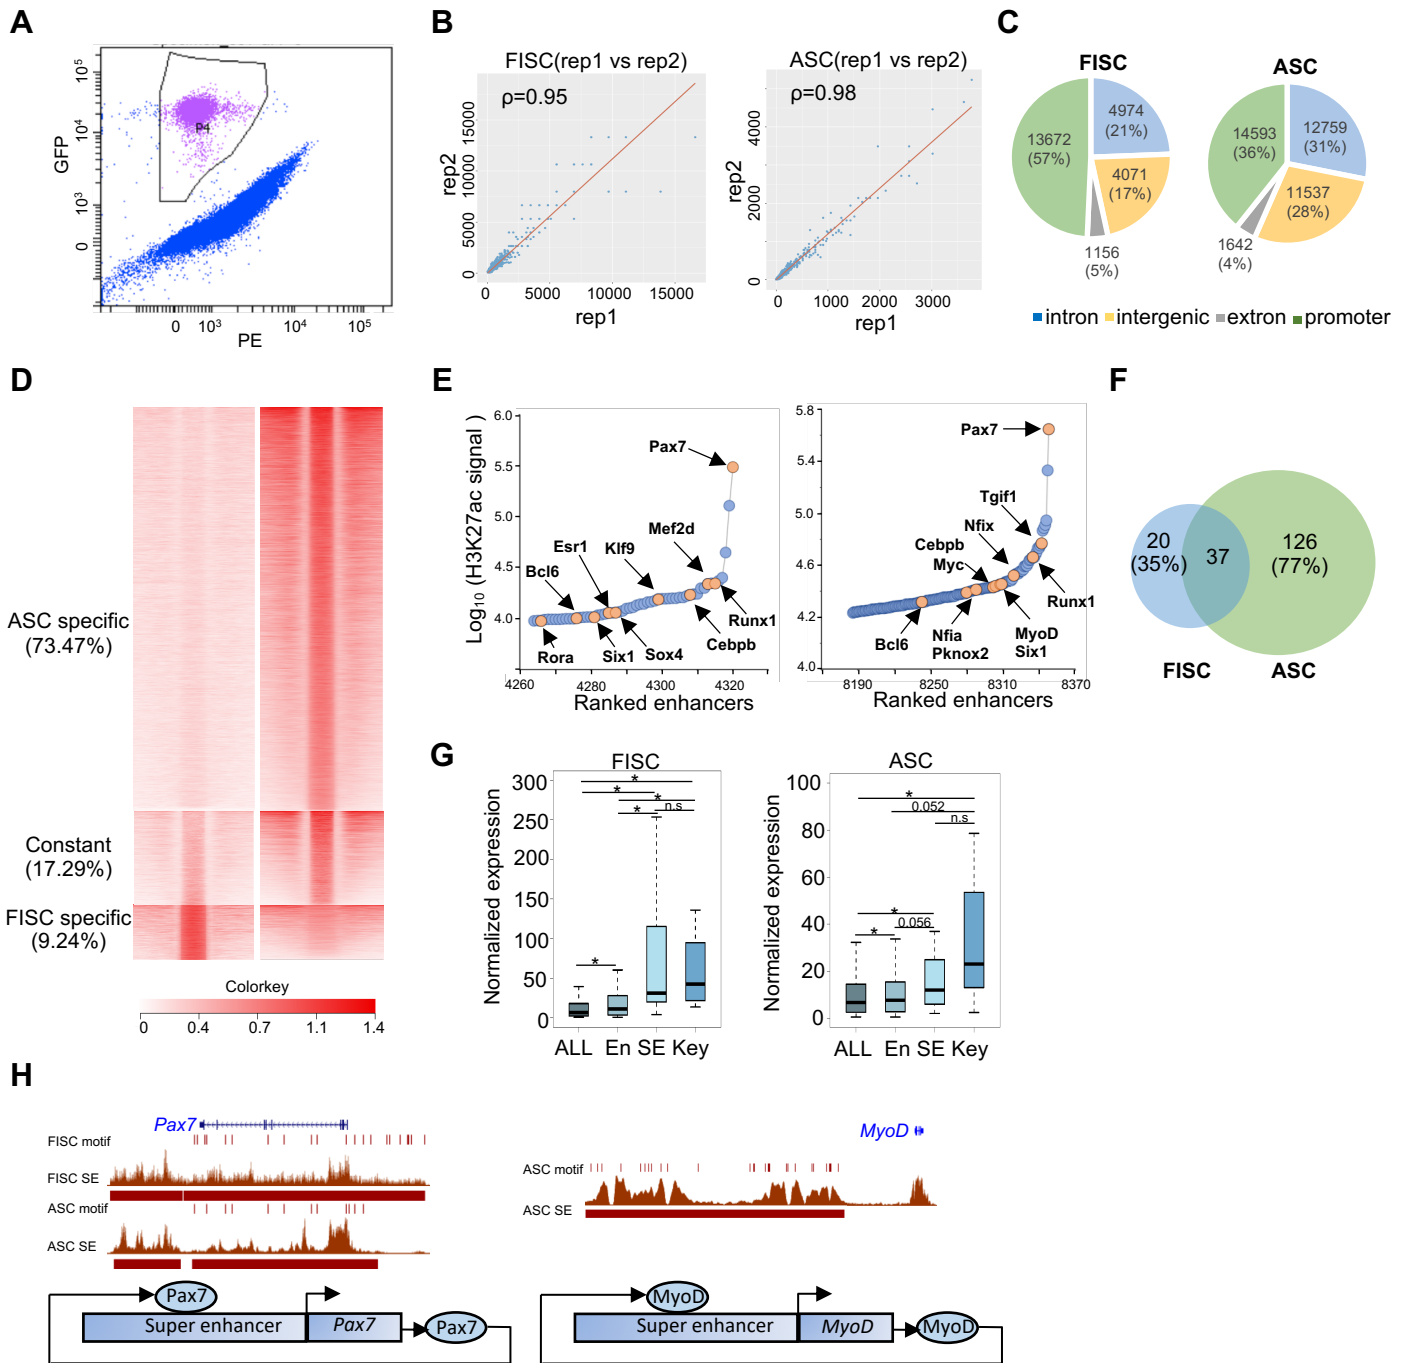

**A**

|        | FPKM   |         |         |
|--------|--------|---------|---------|
|        | QSC-T0 | FISC-T3 | FISC-T5 |
| Myc    | 17.07  | 47.59   | 33.78   |
| Bcl6   | 21.78  | 10.10   | 11.25   |
| Rora   | 26.23  | 18.07   | 16.32   |
| Esr1   | 19.46  | 12.42   | 12.16   |
| Pknox2 | 5.09   | 3.28    | 1.93    |
| Sox4   | 13.29  | 17.66   | 14.24   |

**B**

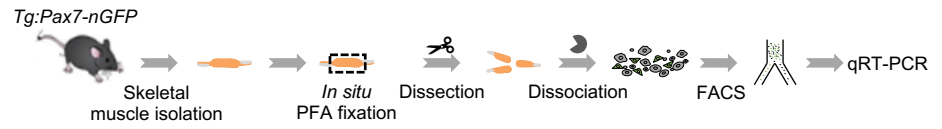

**C**

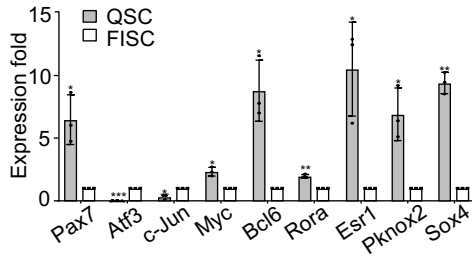

**D**

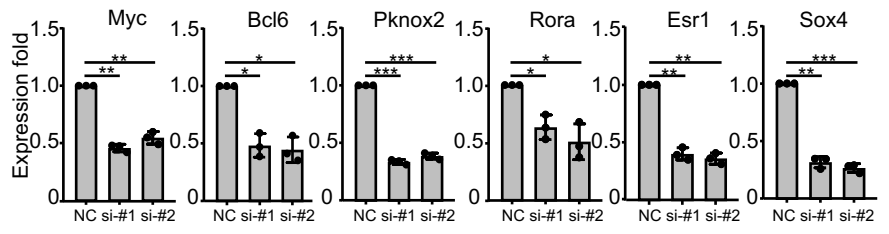

**E**

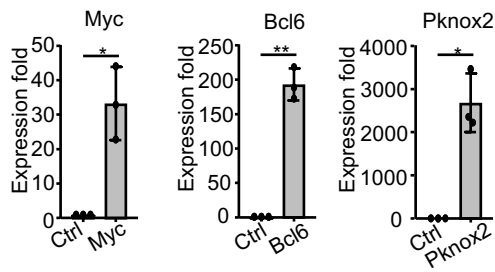

**F**

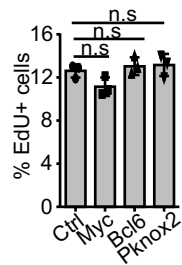

# Supplementary Figure S3 He, Ding et. al.

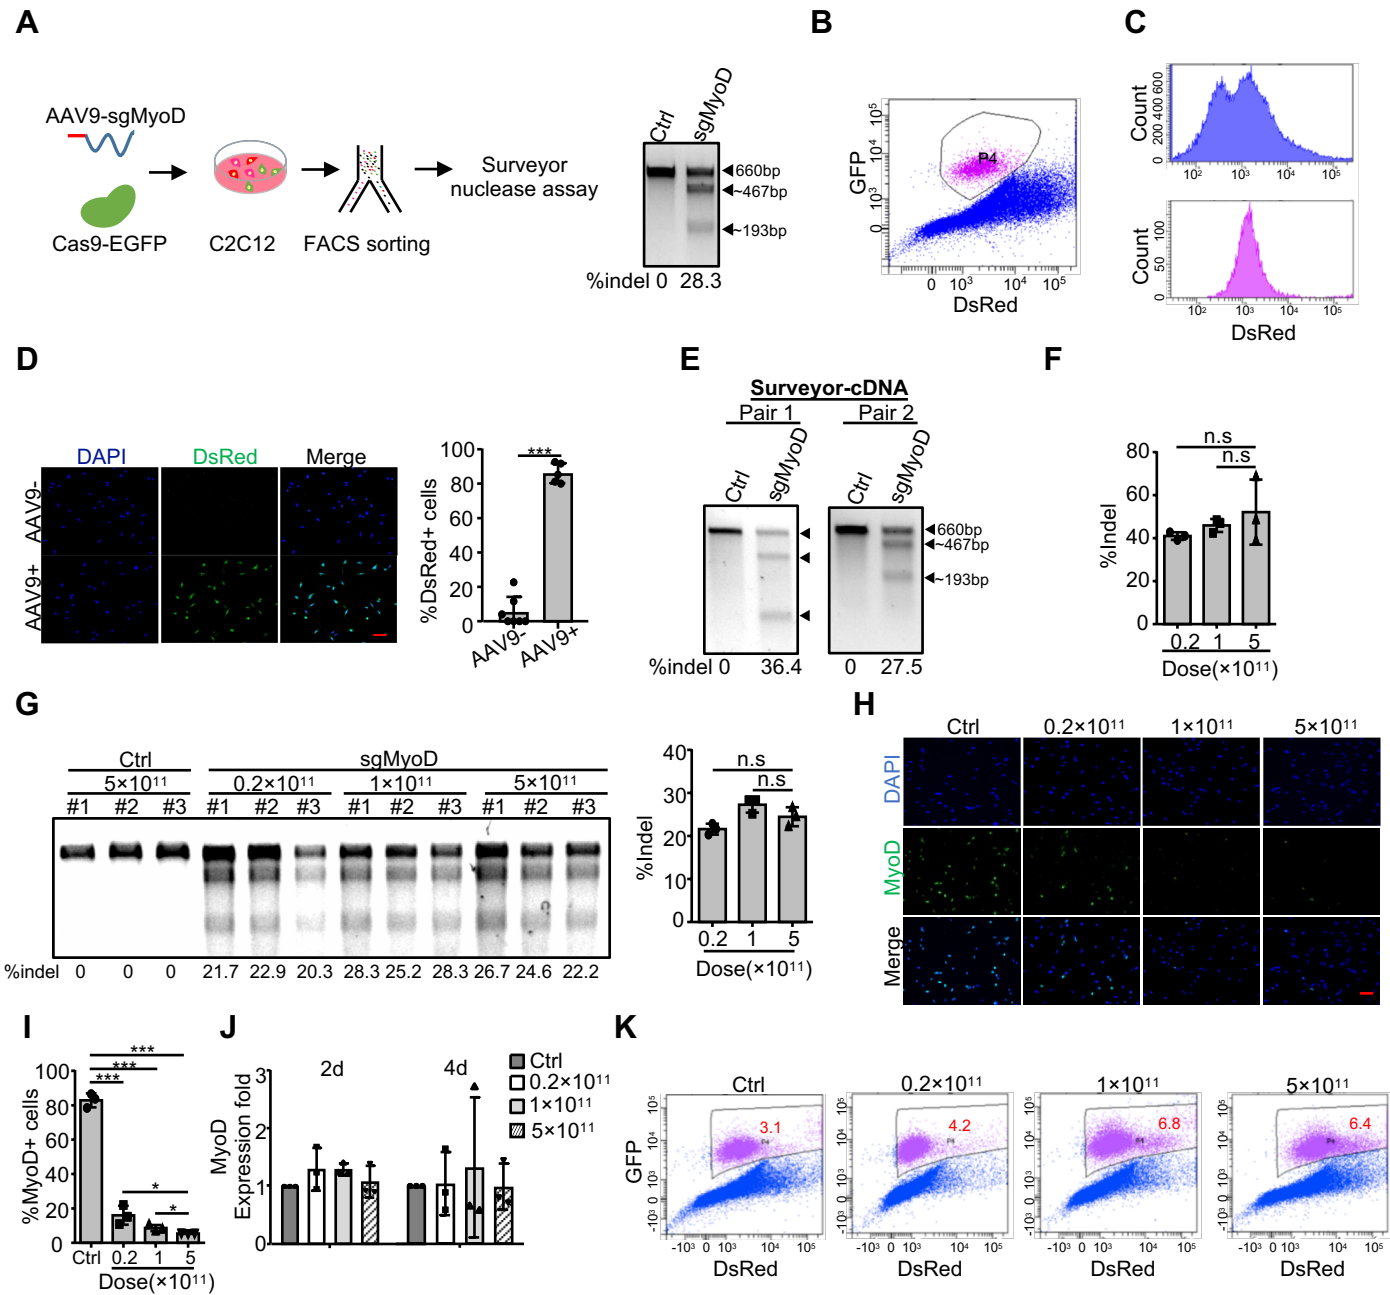

# Supplementary Figure S4 He, Ding et. al.

**A**

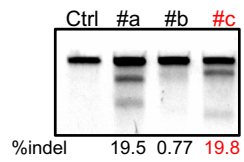

**B**

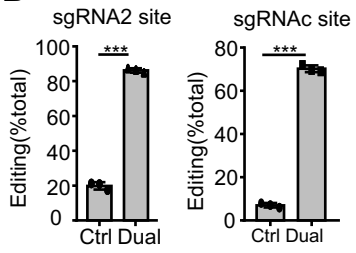

**C**

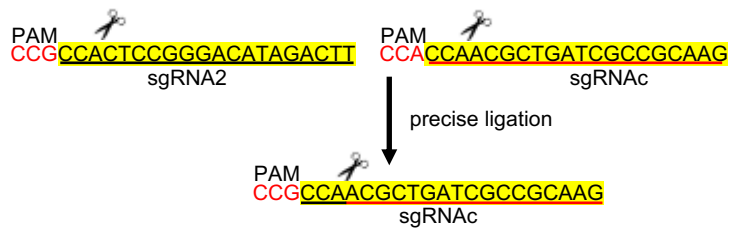

# Supplementary Figure S5 He, Ding et. al.

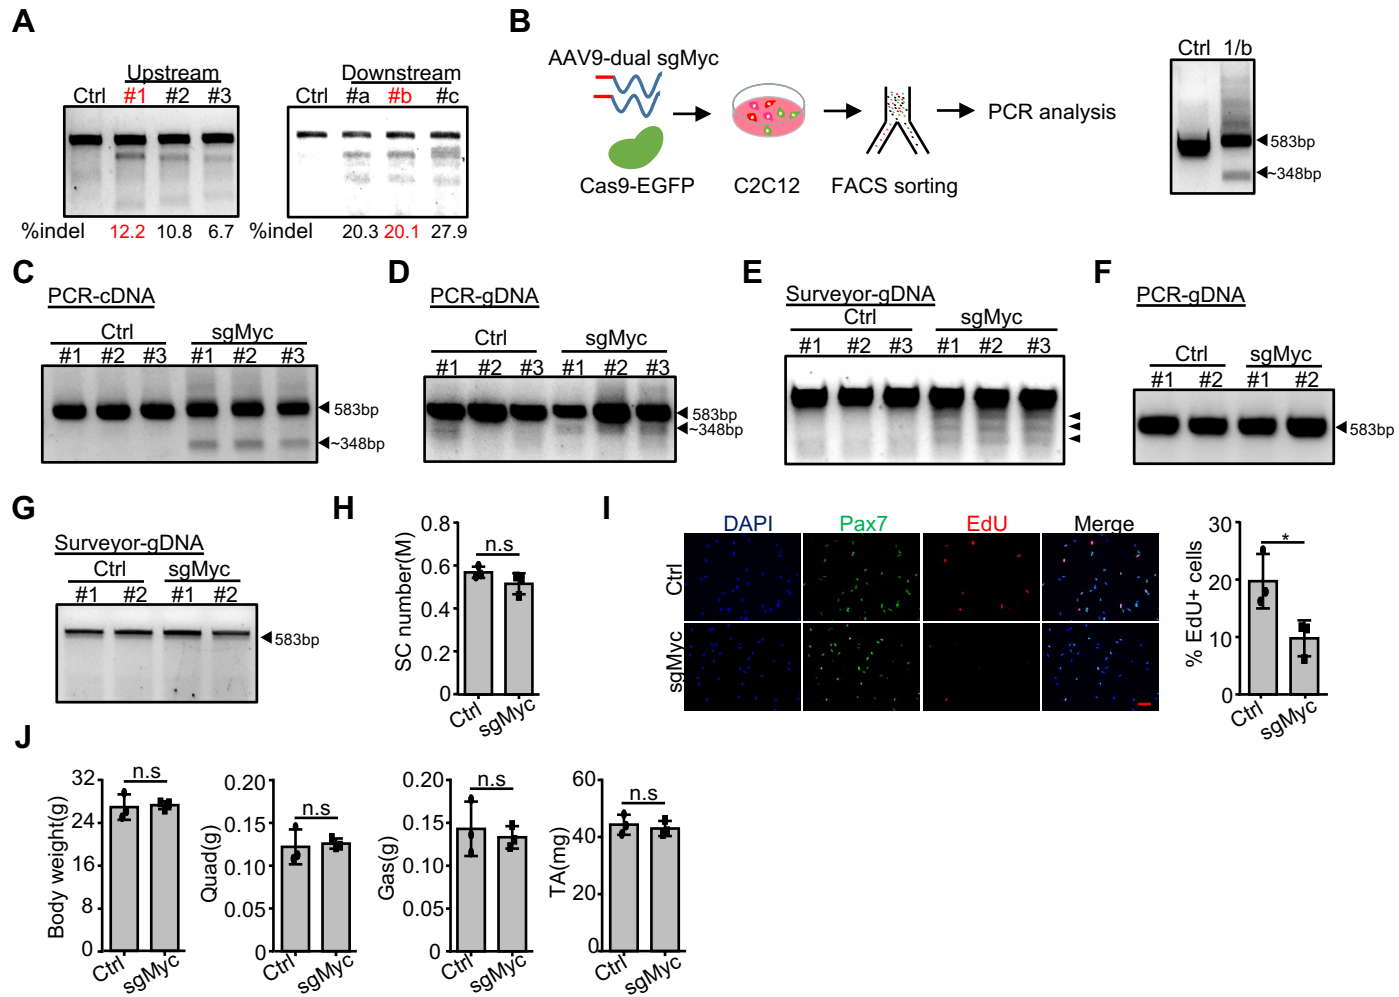

# Supplementary Figure S6 He, Ding et. al.

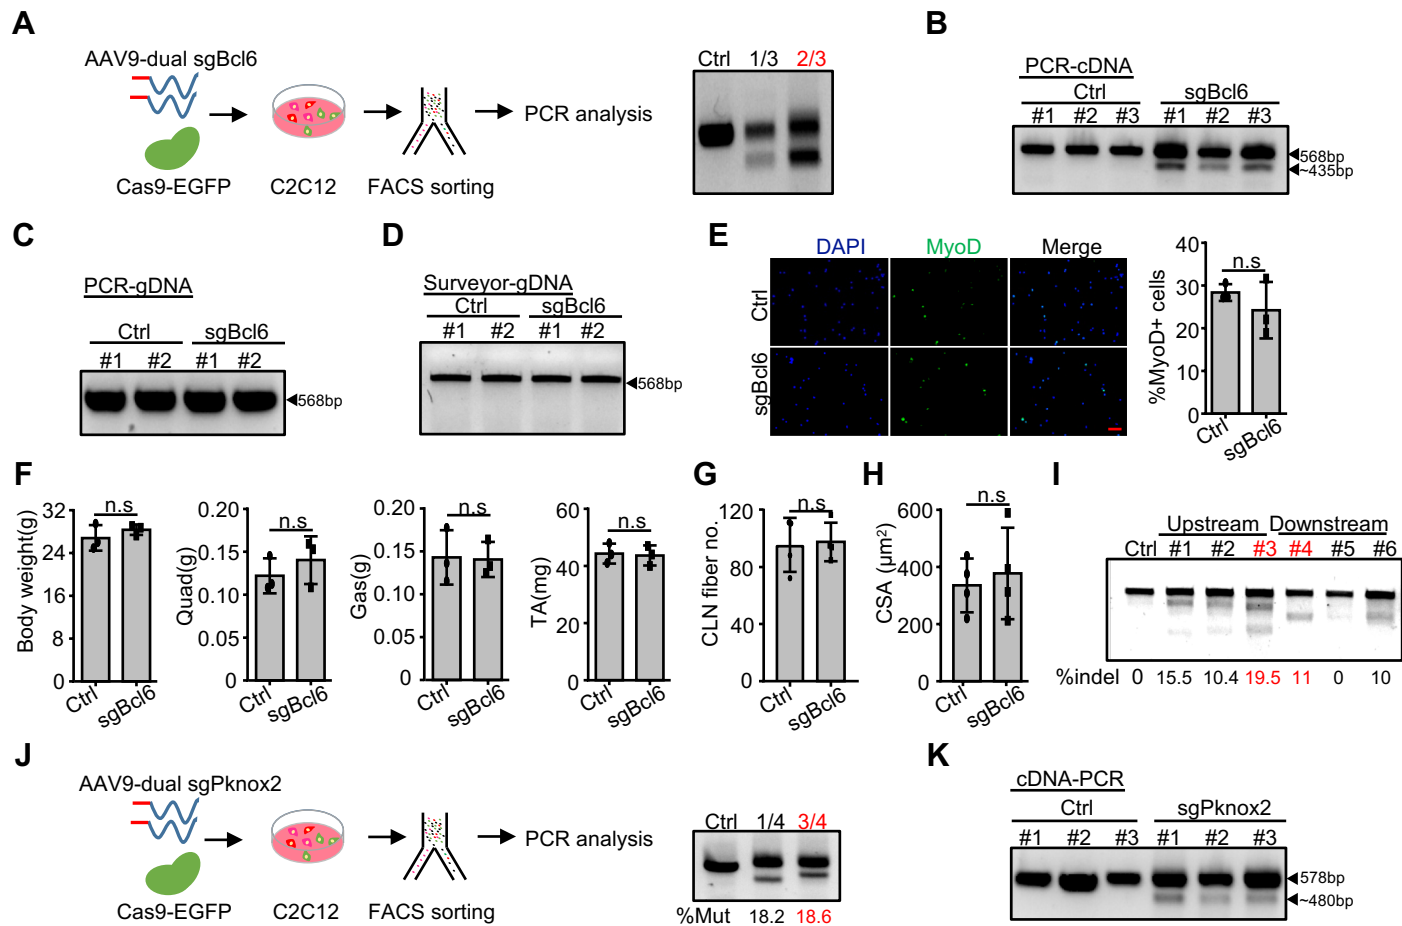

Supplement: Supplementary file [file media-1.pdf]
